# Supplementary material for: Longitudinal study of six seasons of match injuries in elite female rugby union
Source: HighWire-hosted journal article supplement (doi:10.1136/bjsports-2022-105831), 2022-11-25
Supplement: bjsports-2022-105831supp001_data_supplement.pdf [file bjsports-2022-105831supp001_data_supplement.pdf]

**The first longitudinal study of match injuries in elite female rugby union: A 6-season review involving 13 680 match play hours**

Lindsay T Starling<sup>1</sup>, Niki Gabb<sup>1</sup>, Sean Williams<sup>1</sup>, Simon Kemp<sup>2</sup>, Keith A Stokes<sup>1,2</sup>

1. *Department for Health University of Bath, Bath, UK*
2. *Medical Services, Rugby Football Union, London, UK*

**Corresponding author:**

Professor Keith A Stokes

Department for Health, University of Bath, Bath, UK

k.stokes@bath.ac.uk

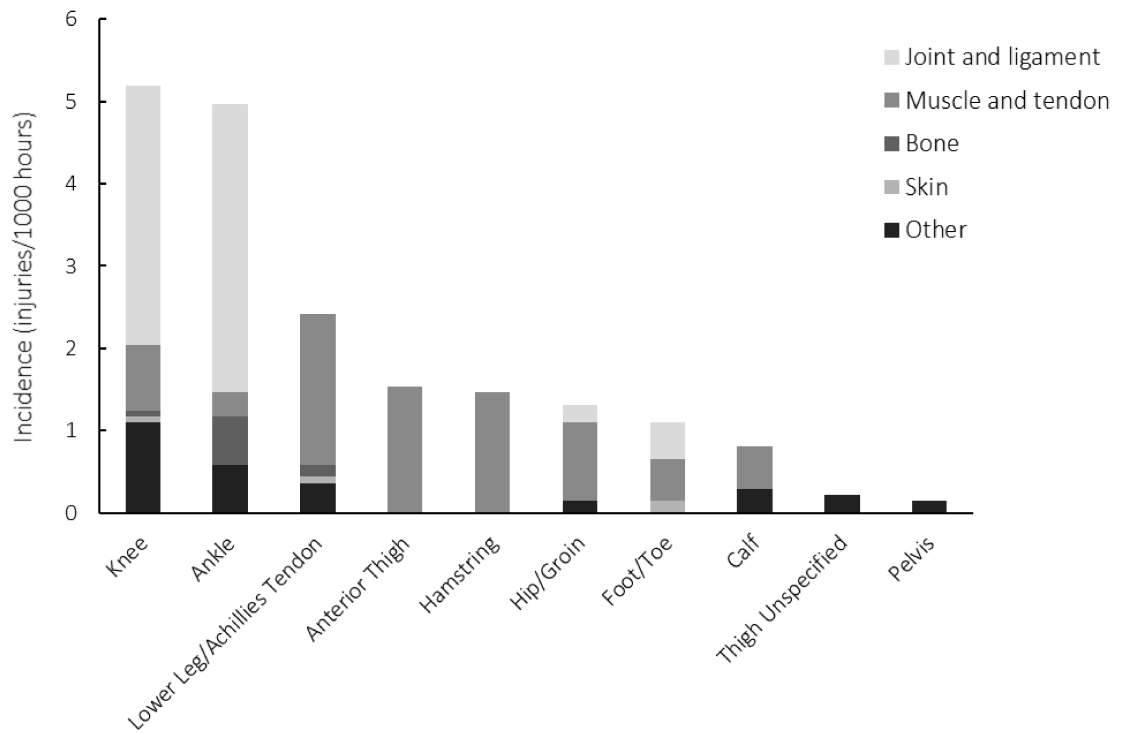

Figure S1: Incidence of lower limb injuries as a function of injury type.
